# Supplementary material for: Prognostic value of circulating endothelial cells in glioblastoma patients: a pilot study
Source: Future Sci OA. 2022 May 24;8(5):FSO796. doi: 10.2144/fsoa-2022-0008 (PMC9136629; doi:10.2144/fsoa-2022-0008)
Supplement: Supplementary file 1 [file fsoa-08-796-s1.xlsx]

## Sheet: Hoja1
SEX	Age at diagnosis	Date diagnostic MRI	Tumor Location	T1 3D	PERFUSION T2	rCBV	Date of Surgery	Extension of the resection	ECOG at diagnosis	ECOG Post Surgery	Pathological Diagnosis	MGMT	IDH	ATRX	KI67	RT	Date RT Start	Date RT End	RT Dose	Date MRI after RT	Concurrente Telozolomide	Adyuvant telozolomide	Number Cycles	Disease progression	Pseudo Disease progression	Date Disease Progression	Date 2 MRI	CEC Subgroup	CEC at Diagnosis	CEC after Rx	CEC Disease Progression 1	CEC Disease Progression 2	Date of death/last contact
1	76	2014-08-05	2	0	1	4.243	2014-08-08	0	1	1	1	2	0	2	3													2	85				2014-08-20
1	69	2014-10-17	1	1	1	3.547	2014-10-27	1	0	1	1	2	0	2	2 (90%)	1	2015-01-02	2015-02-13	60	2015-03-08	1	0	0	1	0	2015-03-08		1	0				2015-03-08
0	61	2015-02-04	2	1	1	2.166	2015-02-12	0	1	1	1	2	0	2	1 (15%)	1			60	2015-06-21	1	1	3	1	0	2015-11-11	2015-09-09	1	6	23			2016-02-07
1	79	2015-02-06	1.2	1	1	0	2015-02-18	2	1	1	1	2	0	2	0	1	2015-03-16	2015-04-27	60		0	0	0	1	0	2015-05-18		2	60	24			2015-10-23
0	51	2015-02-25	2	1	0	0	2015-03-02	0	1	1	1	2	0	2	2(60%)	1	2015-04-10	2015-05-25	60	2015-07-01	1	1	2	1	0	2015-07-01	2015-10-30	2	73				2015-11-16
1	74	2015-03-04	3	1	0	0	2015-03-16	2	1	1	1	2	0	2	2(70%)	1	2015-04-14	2015-05-05	60	2015-06-15	1	0	0	1	0	2015-06-16	2015-06-16	1	5	6			2015-10-13
0	71	2015-06-16	1.2	1	1	3.11	2015-06-22	0	1	1	1	2	0	2	2(30%)	1	2015-08-04	2015-09-14	60	2015-10-20	1	1	3	1	0	2015-10-20	2015-12-18	2	62				2016-01-02
1	70	2015-06-24	1.2	1	1	1.68	2015-06-29	3	1	1	1	2	0	2	2 (40%)	1	2015-08-24	2015-10-02	60	2017-10-30	1	1	6	1	0	2018-03-21	2017-12-15	1	1				2018-04-09
0	62	2015-08-07	3	1	1	0	2015-08-14	3	0	1	1	2	0	2	2 (45%)	1					1	1	1	1	0	2016-02-25		1	1				2016-05-08
0	71	2015-05-10	2	1	1	0	2015-08-17	2	0	1	1	2	0	2	2 (40 %)	1			60		1	0	0	1		2016-06-23		2	954				2016-06-23
0	60	2015-08-12	4	1	1	2.501	2015-09-03	1	0	1	1	0	0	0	3	1	2015-10-08	2015-11-20	60	2015-11-13	1	1	6	1	1	2016-05-11	2015-12-18	1	13				2016-10-30
0	62	2015-09-04	5	0	1	0	2015-09-21	2	1	3	1	2	0	2	2(35%)	1	2015-10-02	2015-10-21	60		0	0	0	1	0	2015-12-20		1	0				2015-12-20
0	50	2015-10-28	1	1	1	3.297	2015-11-03	3	1	0	1	2	0	0	2 (35 %)	1	2015-12-14	2016-01-29	60	2016-03-06	1	1	12	1	0	2018-02-28	2016-06-01	1	13				2018-08-14
0	73	2015-11-27	1	1	1	0	2015-11-30	3	1	1	1	2	0	0	2(25%)	1	2016-02-08	2016-03-18	60	2016-04-20	1	1	3	1	0	2016-04-20	2016-07-04	1	0				2017-12-29
0	42	2016-01-30	2	1	1	2.855	2016-02-02	0	0	1	1	0	0	0	2(50%)	1	2016-03-29	2016-05-10	60	2016-06-04	1	1	6	1	0	2017-02-10	2016-09-16	1	5				2017-07-16
1	68	2016-02-02	2	1	1	4.697	2016-02-15	0		1	1	1	0	0	2 (40%)	1	2016-03-22	2016-03-25			0	0		1	0	2016-05-03		1	6				2016-05-03
1	49	2016-11-10	1	1	1	2.456	2016-11-14	0	1	0	1	1	0	0	0 (15%)	1	21/12/16	2017-02-02	60	2017-03-17	1	1	6	1	0	2018-05-04	2017-06-30	1	0				2018-03-06
0	61	2015-10-06	2	0	0	0	2015-10-09	0	1	0	1	0	0	0	1 (20%)	1	2015-11-16	2015-12-29	60	2016-02-02	1	1	6	1	0	2016-07-28		1	3	31	1329	177	2018-04-25
1	61	2016-02-11	1	0	0	0	2016-02-18	0	0	0	1	1	0	0	3	1	2016-03-29	2016-05-05	60	2016-06-02	1	1	6	0	0	2018-03-16		1	16	13			2018-03-16
0	59	2016-11-04	2	0	0	0	2016-11-10	0	1	0	1	1	0	0	3	1	2016-12-16	2017-01-27	60	2017-02-17	1	1	1	1	0	2017-08-17		1	0				2018-04-25
0	81	2016-12-17	1	0	0	0	2017-01-13	0	1	1	1	1	0	0	0.4	1	2017-03-07	2017-04-21	60	2017-05-25	1	1	12	1	0	2018-04-12		1	0				2018-05-25
0	49	2016-12-14	2	1	1	2.073	2016-12-16	3	1	1	1	0	0	0	0.35	1	2017-02-09	2017-03-23	60	2017-05-05	1	1	6	1	0	2017-05-05		1	0				2018-05-09
0	49	2015-04-01	1	1	1		2015-09-04	0	1	1	2	2	0	1	1 (10%)	1	2017-08-02	2017-09-22	60	2017-10-09	0	0 (PCV)		0	0	2018-02-10	2017-12-01	N/A	4				2018-02-10
0	42	2015-11-30	3	1	1	1.405	2015-12-02	1	0	1	3	2	0	0	1(10%)	1			0									N/A	31
0	55	2016-10-13	1	1	0	0	2016-10-11	0	1	0	4	2	0	2	2(21 %)	1	2016-11-23	2017-01-10	60	2017-02-17	0 (PCV)	0	0	0	0	2018-04-13	2017-05-12	N/A	1				2018-04-13
1	69	2013-12-04	2	0	1	0	2015-09-30	1	1	1	RECURRENCE	2	0	2	3	1	2013-09-03	2013-10-16	60	2013-12-04	1	0	0	1	0	2015-09-04	2014-02-07	N/A	4				2015-11-29
